# Supplementary material for: Structural prediction, analysis and decomposition mechanism of solid M(NH2BH3)n (M = Mg, Ca and Al)
Source: Royal Society of Chemistry journal article supplement (doi:10.1039/c4ra00772g), 2014-01-01
Supplement: c4ra00772g1.pdf [file c4ra00772g1.pdf]

# Supporting material

## Structural Prediction, Analysis and Decomposition Mechanism of Solid $M(\text{NH}_2\text{BH}_3)_n$ ( $M=\text{Mg}$ , $\text{Ca}$ and $\text{Al}$ )

*Kun Wang<sup>a,b</sup>, Vaida Arcisauskaitė<sup>b</sup>, Jian-She Jiao<sup>c</sup>, Jian-Guo Zhang<sup>\*\*a</sup>, Tonglai Zhang<sup>a</sup>, Zun-Ning Zhou<sup>a</sup>*

<sup>a</sup>State Key Laboratory of Explosion Science and Technology, Beijing Institute of Technology, Beijing 100081 P. R. China

<sup>b</sup>Department of Chemistry, Inorganic Chemistry Laboratory, University of Oxford, South Parks Road, Oxford OX1 3QR, United Kingdom

<sup>c</sup>Research Institute of FA and ADA Equipment and Technology, General Armament Department, Beijing 100012

### **S1: MC packing algorithm**

Polymorph's Monte Carlo packing algorithm follows a simulated annealing procedure intended to search for the lowest minima of the energy function  $E$  of molecular crystals. The simulated annealing method works around minima value of  $E$  by treating the search for the global minimum of  $E$  as a thermodynamic problem. At some non-zero temperature,  $T$ , the crystal changes its structure randomly, and its energy fluctuates accordingly. To prevent the simulation from becoming trapped in a local minimum, cooling begins at a relatively high temperature; every crystal structure (within the constraints of the space group and asymmetric unit contents) can then theoretically be reached, and ergodicity therefore ensured [1].

The simulation consists of two phases, heating and cooling. First, each trial crystal is heated. During heating, one starts from a set minimum temperature (300 K in our case). Each new trial temperature  $T_{\text{new}}$  is obtained using Eq. 1, where  $T_{\text{old}}$  is the temperature used in a previous step and  $T_h$  is a heating factor (1 in our case). Heating continues until either a pre-set maximum temperature is reached ( $3 \times 10^5$  K in our case) or a specified number of consecutive trial moves have been accepted.

$$T_{\text{new}} = T_{\text{old}} \times (1.0 + T_h) \quad (1)$$

The cooling phase simulates the annealing of a heated structure. At high temperatures the algorithm is able to globally sample the phase space of possible packing arrangements. At low temperatures the algorithm samples areas of energetically favourable packing arrangements more locally. If a trial is accepted during cooling, the temperature to be used in the next trial step,  $T_{new}$ , is obtained using Eq. 2, where  $T_{old}$  is the temperature used in a previous step and  $T_c$  is a user-definable cooling factor (0.0005 in our case).

$$T_{new} = T_{old} \times (1.0 + T_c) \quad (2)$$

The simulation ends when  $T$  is so low that the crystal is frozen (300 K in our case). Then one can optimize at 300 K all the found structures during the annealing procedure and determine the structure of the lowest energy.

The determination of space group is based on the principle pointed by Belsky<sup>[2]</sup> and determined syngony and cell parameters from XRD experiments<sup>[3,4]</sup>.

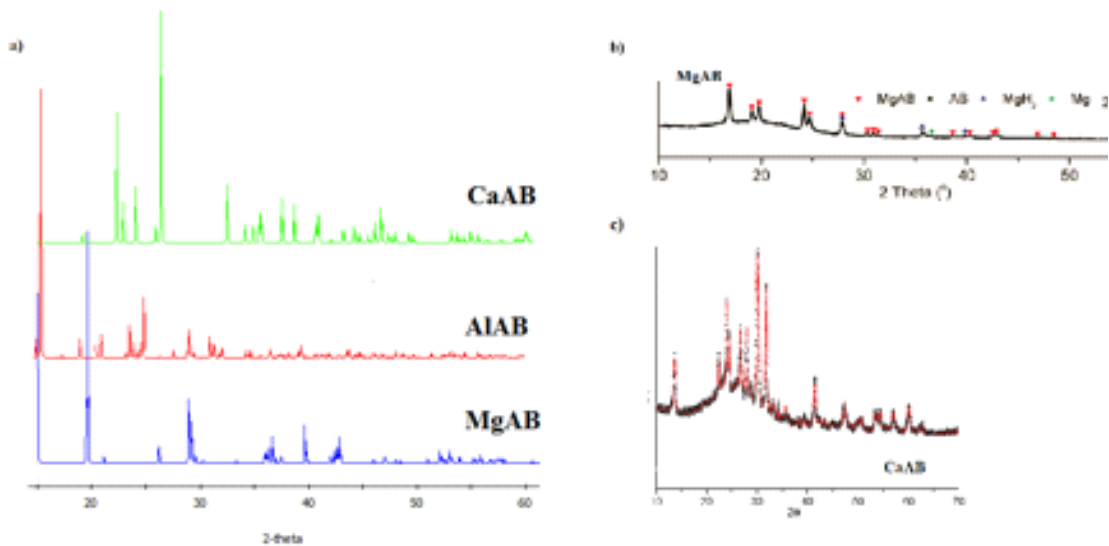

Figure S1. a) The computationally predicted XRD for MgAB, CaAB and AlAB, (b) experimental powder XRD for MgAB ref. [3], (c) experimental single crystal XRD for CaAB ref. [4].

**A: Table S1~S3 Structural information for MABs (M=Ca, Mg, Al) obtained in this study (The values in the brackets are the experimental results)**

Table S1 Structural information for MgAB obtained after geometry optimization with CASTEP

| MgAB                                |       |            |        |
|-------------------------------------|-------|------------|--------|
| Syngony                             |       | monoclinic |        |
| space group                         |       | C2         |        |
| a                                   | 8.417 | $\alpha$   | 90.00  |
| b                                   | 6.038 | $\beta$    | 126.08 |
| c                                   | 7.293 | $\gamma$   | 90.00  |
| Fractional coordinates in Å (x y z) |       |            |        |
| B1                                  | 0.772 | 0.289      | 0.169  |
| N2                                  | 0.975 | 0.284      | 0.208  |
| H3                                  | 0.760 | 0.450      | 0.269  |
| H4                                  | 0.137 | 0.799      | 0.962  |
| H5                                  | 0.247 | 0.622      | 0.244  |
| H6                                  | 0.083 | 0.251      | 0.377  |
| H7                                  | 0.010 | 0.439      | 0.181  |
| Mg8                                 | 0.000 | 0.063      | 0.000  |

Table S2 Structural information for CaAB obtained after geometry optimization with CASTEP

| CaAB                                |              |            |              |
|-------------------------------------|--------------|------------|--------------|
| Syngony                             |              | monoclinic |              |
| space group                         |              | C2         |              |
| a                                   | 9.256(9.100) | $\alpha$   | 90.00        |
| b                                   | 4.415(4.371) | $\beta$    | 92.92(93.19) |
| c                                   | 6.613(6.441) | $\gamma$   | 90.00        |
| Fractional coordinates in Å (x y z) |              |            |              |
| H1                                  | 0.922        | 0.914      | 0.713        |
| H2                                  | 0.137        | 0.341      | 0.250        |
| H3                                  | 0.857        | 0.051      | -0.017       |
| H4                                  | 0.643        | 0.123      | 0.601        |
| H5                                  | 0.343        | 0.786      | 0.299        |
| N6                                  | 0.674        | 0.012      | 0.733        |
| B7                                  | 0.834        | 0.078      | 0.796        |
| Ca8                                 | 0.000        | 0.604      | 0.000        |

Table S3 Structural information for AlAB obtained after geometry optimization with CASTEP

|                                     |       |              |        |
|-------------------------------------|-------|--------------|--------|
| AlAB                                |       |              |        |
| Syngony                             |       | orthorhombic |        |
| space group                         |       | PBCA         |        |
| a                                   |       | 17.151       |        |
| b                                   |       | 7.562        |        |
| c                                   |       | 12.387       |        |
| Fractional coordinates in Å (x y z) |       |              |        |
| A11                                 | 0.329 | 0.802        | 0.040  |
| N2                                  | 0.341 | 0.548        | 0.024  |
| H3                                  | 0.400 | 0.525        | 0.045  |
| H4                                  | 0.340 | 0.528        | -0.059 |
| N5                                  | 0.336 | 0.880        | -0.110 |
| H6                                  | 0.392 | 0.928        | -0.123 |
| H7                                  | 0.301 | 0.988        | -0.125 |
| N8                                  | 0.423 | 0.896        | 0.098  |
| H9                                  | 0.419 | 0.909        | 0.181  |
| H10                                 | 0.434 | 1.023        | 0.068  |
| H11                                 | 0.226 | 0.478        | 0.111  |
| H12                                 | 0.280 | 0.274        | 0.031  |
| H13                                 | 0.320 | 0.363        | 0.169  |
| H14                                 | 0.362 | 0.611        | -0.190 |
| H15                                 | 0.249 | 0.677        | -0.172 |
| H16                                 | 0.312 | 0.790        | -0.288 |
| H17                                 | 0.490 | 0.630        | 0.113  |
| H18                                 | 0.498 | 0.754        | -0.031 |
| H19                                 | 0.557 | 0.843        | 0.099  |
| B20                                 | 0.497 | 0.774        | 0.068  |
| B21                                 | 0.291 | 0.411        | 0.087  |
| B22                                 | 0.314 | 0.730        | -0.194 |

Table S4. Comparison of CaAB and MgAB structural parameters determined in this work with the ones determined in other experimental and computational studies.

|             | This work<br>Calc     | Ref 4<br>Exp<br>ESI   | Ref 4<br>Calc<br>Table 1/ESI | Ref 5<br>Calc<br>Table 2/<br>CASTEP | Ref 5<br>Calc<br>Table 2/<br>VASP | Ref 6<br>Calc<br>Table2 |
|-------------|-----------------------|-----------------------|------------------------------|-------------------------------------|-----------------------------------|-------------------------|
| <b>CaAB</b> |                       |                       |                              |                                     |                                   |                         |
| <b>Ca-N</b> | <b>2.480</b>          | <b>2.452</b>          | <b>2.466</b>                 | <b>2.446</b>                        | <b>2.435</b>                      | <b>2.476</b>            |
| N-B         | 1.547                 | 1.547                 | 1.546                        | 1.538                               | 1.541                             | 1.546                   |
| N-H         | 1.031/1.031           | 1.022/1.022           | 1.025/1.025                  | 1.027/1.031                         | 1.020/1.022                       | 1.022/1.022             |
| B-H         | 1.231/1.243/<br>1.249 | 1.243/1.245/<br>1.251 | 1.230/1.243/<br>1.250        | 1.226/1.240/<br>1.252               | 1.228/1.247/<br>1.260             | 1.229/1.242/<br>1.249   |
| <b>MgAB</b> |                       |                       |                              |                                     |                                   |                         |
| <b>Mg-N</b> | <b>2.123</b>          | -                     | -                            | -                                   | -                                 | <b>2.111</b>            |
| N-B         | 1.556                 | -                     | -                            | -                                   | -                                 | 1.556                   |
| N-H         | 1.033/1.034           | -                     | -                            | -                                   | -                                 | 1.023/1.024/<br>1.025   |
| B-H         | 1.218/1.245/<br>1.256 | -                     | -                            | -                                   | -                                 | 1.237/1.245/<br>1.254/  |

[1] Accelrys, Polymorph Predictor <http://accelrys.com/products/datasheets/polymorph-predictor.pdf>. 2011

[2] Belsky VK, Zorkii PM. Acta Crystallogr Sect A. 1977;33:1004.

[3] Luo J, Kang X, Wang P. Energy Environ Sci. 2013;6:1018.

[4] Wu H, Zhou W, Yildirim TJ. Am Chem Soc. 2008;130:14834.

[5] Lingam CB, Babu KR, Tewari SP, Vaitheeswaran G, Lebegue S. J. Phys. Chem. C 2011;115:18795.

[6] Li W, Wu G, Chua Y, Feng YP and Chen P. Inorg Chem 2011;51:76.
